# Supplementary material for: Isotopically enriched ammonium shows high nitrogen transformation in the pile top zone of dairy manure compost
Source: Copernicus journal article supplement (doi:10.5194/bg-13-1341-2016), 2016-03-02
Supplement: Supplementary file 1 [file bg-13-1341-2016-supplement.zip]

Maeda et al., Fig. S1

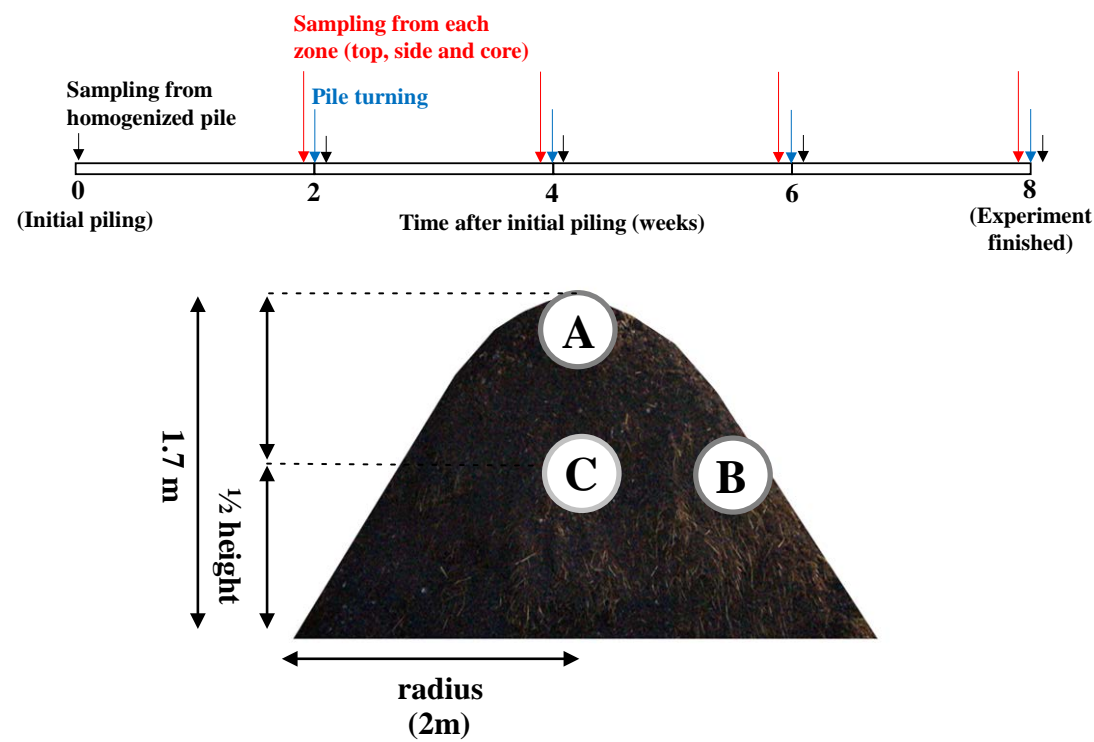

Details of the sampling time and location in the pile (A: pile top, B: pile side, C: pile core, respectively.)
