# Supplementary material for: Isotopically enriched ammonium shows high nitrogen transformation in the pile top zone of dairy manure compost
Source: Copernicus journal article supplement (doi:10.5194/bg-13-1341-2016), 2016-03-02
Supplement: Supplementary file 2 [file bg-13-1341-2016-supplement.zip]

Archive with 2 entries (2 files):
- Maeda et al., Fig. S1.pdf
- bg-13-1341-2016-supplement-title-page.pdf
