# Supplementary material for: Isotopically enriched ammonium shows high nitrogen transformation in the pile top zone of dairy manure compost
Source: Copernicus journal article supplement (doi:10.5194/bg-13-1341-2016), 2016-03-02
Supplement: Supplementary file 2 [file bg-13-1341-2016-supplement.zip › bg-13-1341-2016-supplement-title-page.pdf]

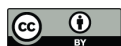

## *Supplement of*

# **Isotopically enriched ammonium shows high nitrogen transformation in the pile top zone of dairy manure compost**

**Koki Maeda et al.**

*Correspondence to:* Koki Maeda ([k\\_maeda@affrc.go.jp](mailto:k_maeda@affrc.go.jp))

- [bg-13-1341-2016-supplement-title-page.pdf](#)
- [Maeda et al., Fig. S1.pdf](#)

The copyright of individual parts of the supplement might differ from the CC-BY 3.0 licence.
